# Supplementary material
Source: Springer Nature journal article supplement (https://www.springermedizin.de/resource/supplementary/13012_2011_356_MOESM1_ESM.pdf/9629844)
Supplement: MOESM1 [file 9629844]

**Research Centers**

- NIATx (Part of the Center for Health Enhancement System Studies [CHESS]), University of Wisconsin, Madison, WI
- Center for Substance Abuse Research and Policy, Oregon Health & Science University, Portland, OR
- Health Economics Research Group, University of Miami, Miami, FL

**Single-State Authorities  
in Five States**

**Study Interventions**

NIATx randomly assigned the agencies in each state to the four interventions. Each intervention used a **web-based learning kit plus** the collaborative service(s) below:

**1. Interest circle calls** Monthly teleconferences in which agency change staff got advice from peers and coach.

**2. Coaching** Initial site visit, monthly teleconferences, and e-mail. Coach worked with agency head, change leaders, and change teams.

**3. Learning sessions** Face-to-face, multi-day conferences held twice a year involving change staff from several agencies and outside experts.

**4. Combination** of interest circle calls, coaching, and learning sessions

Low

**Cost of Intervention**

High
